# Supplementary material for: Association between Alcohol Intake and Prostate Cancer Mortality and Survival
Source: Nutrients. 2023 Feb 12;15(4):925. doi: 10.3390/nu15040925 (PMC9965886; doi:10.3390/nu15040925)
Supplement: Supplementary file 1 [file nutrients-15-00925-s001.zip › nutrients-2164511-supplementary.pdf]

Tables and Figures

**Table S1.** PRISMA checklist.

| Section and Topic             | Item # | Checklist item                                                                                                                                                                                                                                                                                       | Location where item is reported |
|-------------------------------|--------|------------------------------------------------------------------------------------------------------------------------------------------------------------------------------------------------------------------------------------------------------------------------------------------------------|---------------------------------|
| <b>TITLE</b>                  |        |                                                                                                                                                                                                                                                                                                      |                                 |
| Title                         | 1      | Identify the report as a systematic review.                                                                                                                                                                                                                                                          | 1                               |
| <b>ABSTRACT</b>               |        |                                                                                                                                                                                                                                                                                                      |                                 |
| Abstract                      | 2      | See the PRISMA 2020 for Abstracts checklist.                                                                                                                                                                                                                                                         | S5                              |
| <b>INTRODUCTION</b>           |        |                                                                                                                                                                                                                                                                                                      |                                 |
| Rationale                     | 3      | Describe the rationale for the review in the context of existing knowledge.                                                                                                                                                                                                                          | 2                               |
| Objectives                    | 4      | Provide an explicit statement of the objective(s) or question(s) the review addresses.                                                                                                                                                                                                               | 3                               |
| <b>METHODS</b>                |        |                                                                                                                                                                                                                                                                                                      |                                 |
| Eligibility criteria          | 5      | Specify the inclusion and exclusion criteria for the review and how studies were grouped for the syntheses.                                                                                                                                                                                          | 3                               |
| Information sources           | 6      | Specify all databases, registers, websites, organisations, reference lists and other sources searched or consulted to identify studies. Specify the date when each source was last searched or consulted.                                                                                            | 3                               |
| Search strategy               | 7      | Present the full search strategies for all databases, registers and websites, including any filters and limits used.                                                                                                                                                                                 | 3                               |
| Selection process             | 8      | Specify the methods used to decide whether a study met the inclusion criteria of the review, including how many reviewers screened each record and each report retrieved, whether they worked independently, and if applicable, details of automation tools used in the process.                     | 3-4                             |
| Data collection process       | 9      | Specify the methods used to collect data from reports, including how many reviewers collected data from each report, whether they worked independently, any processes for obtaining or confirming data from study investigators, and if applicable, details of automation tools used in the process. | 3-4                             |
| Data items                    | 10a    | List and define all outcomes for which data were sought. Specify whether all results that were compatible with each outcome domain in each study were sought (e.g. for all measures, time points, analyses), and if not, the methods used to decide which results to collect.                        | 3-4                             |
|                               | 10b    | List and define all other variables for which data were sought (e.g. participant and intervention characteristics, funding sources). Describe any assumptions made about any missing or unclear information.                                                                                         | 3-4                             |
| Study risk of bias assessment | 11     | Specify the methods used to assess risk of bias in the included studies, including details of the tool(s) used, how many reviewers assessed each study and whether they worked independently, and if applicable, details of automation tools                                                         | 4                               |

| Section and Topic             | Item # | Checklist item                                                                                                                                                                                                                                              | Location where item is reported      |
|-------------------------------|--------|-------------------------------------------------------------------------------------------------------------------------------------------------------------------------------------------------------------------------------------------------------------|--------------------------------------|
|                               |        | used in the process.                                                                                                                                                                                                                                        |                                      |
| Effect measures               | 12     | Specify for each outcome the effect measure(s) (e.g. risk ratio, mean difference) used in the synthesis or presentation of results.                                                                                                                         | 4                                    |
| Synthesis methods             | 13a    | Describe the processes used to decide which studies were eligible for each synthesis (e.g. tabulating the study intervention characteristics and comparing against the planned groups for each synthesis (item #5)).                                        | 5                                    |
|                               | 13b    | Describe any methods required to prepare the data for presentation or synthesis, such as handling of missing summary statistics, or data conversions.                                                                                                       | 4                                    |
|                               | 13c    | Describe any methods used to tabulate or visually display results of individual studies and syntheses.                                                                                                                                                      | 4                                    |
|                               | 13d    | Describe any methods used to synthesize results and provide a rationale for the choice(s). If meta-analysis was performed, describe the model(s), method(s) to identify the presence and extent of statistical heterogeneity, and software package(s) used. | 4                                    |
|                               | 13e    | Describe any methods used to explore possible causes of heterogeneity among study results (e.g. subgroup analysis, meta-regression).                                                                                                                        | 4                                    |
|                               | 13f    | Describe any sensitivity analyses conducted to assess robustness of the synthesized results.                                                                                                                                                                | 4                                    |
| Reporting bias assessment     | 14     | Describe any methods used to assess risk of bias due to missing results in a synthesis (arising from reporting biases).                                                                                                                                     | 4                                    |
| Certainty assessment          | 15     | Describe any methods used to assess certainty (or confidence) in the body of evidence for an outcome.                                                                                                                                                       | 4                                    |
| <b>RESULTS</b>                |        |                                                                                                                                                                                                                                                             |                                      |
| Study selection               | 16a    | Describe the results of the search and selection process, from the number of records identified in the search to the number of studies included in the review, ideally using a flow diagram.                                                                | 4 and Figure 1                       |
|                               | 16b    | Cite studies that might appear to meet the inclusion criteria, but which were excluded, and explain why they were excluded.                                                                                                                                 | 4 and Figure 1                       |
| Study characteristics         | 17     | Cite each included study and present its characteristics.                                                                                                                                                                                                   | 4 and Tab1, Tab2, Tab3 and Tab4      |
| Risk of bias in studies       | 18     | Present assessments of risk of bias for each included study.                                                                                                                                                                                                | 5-6                                  |
| Results of individual studies | 19     | For all outcomes, present, for each study: (a) summary statistics for each group (where appropriate) and (b) an effect estimate and its precision (e.g. confidence/credible interval), ideally using structured tables or plots.                            | 5-6 and Figure2, Figure3 and Figure4 |
| Results of syntheses          | 20a    | For each synthesis, briefly summarise the characteristics and risk of bias among contributing studies.                                                                                                                                                      | 5-6                                  |

| Section and Topic                              | Item # | Checklist item                                                                                                                                                                                                                                                                       | Location where item is reported |
|------------------------------------------------|--------|--------------------------------------------------------------------------------------------------------------------------------------------------------------------------------------------------------------------------------------------------------------------------------------|---------------------------------|
|                                                | 20b    | Present results of all statistical syntheses conducted. If meta-analysis was done, present for each the summary estimate and its precision (e.g. confidence/credible interval) and measures of statistical heterogeneity. If comparing groups, describe the direction of the effect. | 5-6                             |
|                                                | 20c    | Present results of all investigations of possible causes of heterogeneity among study results.                                                                                                                                                                                       | 5-6                             |
|                                                | 20d    | Present results of all sensitivity analyses conducted to assess the robustness of the synthesized results.                                                                                                                                                                           | 5-6                             |
| Reporting biases                               | 21     | Present assessments of risk of bias due to missing results (arising from reporting biases) for each synthesis assessed.                                                                                                                                                              | 5-6                             |
| Certainty of evidence                          | 22     | Present assessments of certainty (or confidence) in the body of evidence for each outcome assessed.                                                                                                                                                                                  | 5-6                             |
| <b>DISCUSSION</b>                              |        |                                                                                                                                                                                                                                                                                      |                                 |
| Discussion                                     | 23a    | Provide a general interpretation of the results in the context of other evidence.                                                                                                                                                                                                    | 14-15                           |
|                                                | 23b    | Discuss any limitations of the evidence included in the review.                                                                                                                                                                                                                      | 15                              |
|                                                | 23c    | Discuss any limitations of the review processes used.                                                                                                                                                                                                                                | 15                              |
|                                                | 23d    | Discuss implications of the results for practice, policy, and future research.                                                                                                                                                                                                       | 16                              |
| <b>OTHER INFORMATION</b>                       |        |                                                                                                                                                                                                                                                                                      |                                 |
| Registration and protocol                      | 24a    | Provide registration information for the review, including register name and registration number, or state that the review was not registered.                                                                                                                                       | 3                               |
|                                                | 24b    | Indicate where the review protocol can be accessed, or state that a protocol was not prepared.                                                                                                                                                                                       | 3                               |
|                                                | 24c    | Describe and explain any amendments to information provided at registration or in the protocol.                                                                                                                                                                                      | 3                               |
| Support                                        | 25     | Describe sources of financial or non-financial support for the review, and the role of the funders or sponsors in the review.                                                                                                                                                        | 16                              |
| Competing interests                            | 26     | Declare any competing interests of review authors.                                                                                                                                                                                                                                   | 16                              |
| Availability of data, code and other materials | 27     | Report which of the following are publicly available and where they can be found: template data collection forms; data extracted from included studies; data used for all analyses; analytic code; any other materials used in the review.                                           | NA                              |

From: Page MJ, McKenzie JE, Bossuyt PM, Boutron I, Hoffmann TC, Mulrow CD, et al. The PRISMA 2020 statement: an updated guideline for reporting systematic reviews. *BMJ* 2021;372:n71. doi: 10.1136/bmj.n71

For more information, visit: <http://www.prisma-statement.org/>

**Table S2.** PECO (P = Population, E = Exposure, C = Comparison, O = Outcome) criteria for the systematic literature review on the association between alcohol intake and the incidence of fatal prostate cancer (PCa), PCa mortality, and the overall and cancer-specific survival, and clinical surrogates of survival, of PCa patients.

|                 |                                                                                                                       |               |                                                      |                                                                                         |
|-----------------|-----------------------------------------------------------------------------------------------------------------------|---------------|------------------------------------------------------|-----------------------------------------------------------------------------------------|
| Populations (P) | Healthy subjects                                                                                                      |               | PCa patients                                         |                                                                                         |
| Exposure (E)    | Current or former alcohol drinkers, or heavy drinkers, or subjects with a history of alcohol dependency / alcoholism. |               |                                                      |                                                                                         |
| Comparison (C)  | Never drinkers, or light drinkers, or subjects without a history of alcohol dependency / alcoholism.                  |               |                                                      |                                                                                         |
| Outcome (O)     | Fatal PCa incidence                                                                                                   | PCa mortality | Overall and cancer-specific survival of PCa patients | Clinical surrogates of PCa patients' survival (e.g. biochemical failure and PSA growth) |

**Table S3:** Main characteristics of the studies included in the review that reported on the association between alcohol intake and the risk of fatal prostate cancer.

| First Author, PY                 | Period/ Follow-up                                                                                     | Country/ Study name               | Study design       | Study population               | Alcohol assessment                                |
|----------------------------------|-------------------------------------------------------------------------------------------------------|-----------------------------------|--------------------|--------------------------------|---------------------------------------------------|
| Hsing A.W. et al. 1990<br>[28]   | Baseline assessment 1966; last follow-up 1986 (data source: death certificates)                       | Lutheran Brotherhood Cohort Study | Cohort             | n=17,633, median age 51 yrs    | Questionnaire at baseline in 1966 (pre-diagnosis) |
| Platz A.E. et al. 2003<br>[29]   | Baseline assessment 1986; last follow-up 1998 (data source: National Death Index and medical records) | US                                | Prospective cohort | n=47,843; range age=40-75 yrs  | FFQ in 1986, 1988, 1990 and 1998                  |
| Watters L.J. et al. 2010<br>[30] | Baseline assessment 1995-1996; last follow-up 2005 (data source: national cancer registries)          | US                                | Prospective cohort | n=294,707, range age=50-71 yrs | FFQ at baseline in 1995-1996 (pre-diagnosis)      |
| Swedish                          |                                                                                                       |                                   |                    |                                | not specified                                     |

|                                   |                                                                                                                 |         |                               |                                     |                   |
|-----------------------------------|-----------------------------------------------------------------------------------------------------------------|---------|-------------------------------|-------------------------------------|-------------------|
| Huynh-Le M.P. et al.<br>2021 [31] | Baseline assessment 1997; last<br>follow-up 2011 (data source not<br>specified)                                 |         | Nestetd case-control<br>study | n=2,163, median<br>age=72.4 yrs     |                   |
| Dahlman D. et al.<br>2022 [32]    | Baseline assessment 1997;<br>average follow-up time 15,2±5,6<br>yrs (data source: Swedish<br>national register) | Swedish | Prospective cohort            | n=1,361,532; range age<br>50-75 yrs | ICD-10 F10 and K7 |

**Table S4:** Main characteristics of the studies included in the review that reported on the association between alcohol intake and the risk of death from prostate cancer in healthy subjects.

| First Author, PY              | Period/ Follow-up                                                                                                 | Country/ Study name | Study design            | Study population                                                                                                                                                                                   | Alcohol assessment                                                                         |
|-------------------------------|-------------------------------------------------------------------------------------------------------------------|---------------------|-------------------------|----------------------------------------------------------------------------------------------------------------------------------------------------------------------------------------------------|--------------------------------------------------------------------------------------------|
| Baglietto L. et al. 2006 [33] | Baseline assessment 1990-1994; last follow-up 2003 (data source: Victoria death records and National Death Index) | Australia           | Prospective cohort      | n=16,872; age range =27-75 yrs                                                                                                                                                                     | Structured questionnaires and diaries at baseline (pre-diagnosis)                          |
| Kim M.K. et al 2010 [34]      | Baseline assessment 2000; last follow-up 2005 (data source: national death certificate)                           | Korea               | Prospective cohort      | n=1,341,393; age range =40-69 yrs                                                                                                                                                                  | Baseline assessment (pre-diagnosis); method not specified                                  |
| Breslow R.A. et al. 2011 [35] | Baseline assessment 1988; last follow-up 2006 (data source: National Center for Health Statistics)                | US                  | Prospective cohort      | n=138,590; mean age=42.3 for "never drinker", 54.0 for "former drinker", 49.6 for "lifetime infrequent drinker"; 41.7 for "light drinker", 42.5 for "moderate drinker", 41.4 for "heavier drinker" | Assessment at baseline in 1988 and later in 1990, 1991 and 1997-2004; method not specified |
| Fowke J.H. et al. 2015 [36]   | Baseline assessment 1963; last follow-up 2006 (data source: death certificates)                                   | Asia                | PP <sup>1</sup> cohorts | n=522,736, mean age 53.7 yr                                                                                                                                                                        | Questionnaire at baseline in 1963                                                          |

|                                    |                                                                                                                      |         |                       |                             |                                    |  |
|------------------------------------|----------------------------------------------------------------------------------------------------------------------|---------|-----------------------|-----------------------------|------------------------------------|--|
|                                    |                                                                                                                      |         |                       |                             |                                    |  |
| Dickerman B.A.<br>et al. 2016 [37] | Baseline assessment 1975; last<br>follow-up 2012 (data source:<br>Finnish Cancer Registry and<br>Statistics Finland) | Finland | Prospective<br>cohort | n=11,372; mean age=40.1 yrs | Questionnaires in 1975 and<br>1981 |  |

<sup>1</sup>PP;Prospective pooled

**Table S5:** Main characteristics of the studies included in the review that reported on the association between alcohol intake and the overall and cancer-specific survival of prostate cancer patients.

| First Author, PY                | Period/ Follow-up                                                                                               | Country/ Study name                               | Study design                  | Study population                                                                       | Alcohol assessment                                                                                                                                                                |
|---------------------------------|-----------------------------------------------------------------------------------------------------------------|---------------------------------------------------|-------------------------------|----------------------------------------------------------------------------------------|-----------------------------------------------------------------------------------------------------------------------------------------------------------------------------------|
| Yu G.P. et al. 1997 [38]        | Incident cases of cancers histologically confirmed identified between 1990-1995 (data source: Cancer Data Base) | US                                                | Prospective cohort            | n=2,461; range age=0 to ≥70 yrs                                                        | Information obtained from the Cancer Data Base                                                                                                                                    |
| Chamie K. et al. 2012 [39]      | Baseline assessment 1997-2004; last follow-up 2010 (data source: California Cancer Registry)                    | California                                        | Retrospective cohort          | n=1,031; age range=66-75 yrs                                                           | Information obtained from medical records                                                                                                                                         |
| Jayadevappa R. et al. 2016 [40] | Baseline assessment 2001-2004; follow-up 4 years after treatment phase (data source: National Cancer Institute) | US                                                | Retrospective cohort          | n=6,611; two age related sub-groups= "young-old aged 66-74 yrs, "old-old" aged ≥75 yrs | Three exclusive time-based categories of substance use as substance use in: pre-phase, treatment-phase, or follow-up phase according to International Classification of Diseases. |
| Brunner C. et al 2016 [41]      | not specified                                                                                                   | 25 studies (US, Australia and European countries) | Mendelian Randomization study | n=23,868; age range= 58.4-72.1                                                         | not specified                                                                                                                                                                     |
| Farris M.S. et al. 2018 [42]    | Baseline assessment 1997-2000; last follow-up 2017 (data source: medical records)                               | Canada                                            | Prospective cohort            | n=829; mean age 67.3                                                                   | In-person interviews (questionnaire, cognitive method and recall calendar) shortly after diagnosis and again 2-3 years post-diagnosis                                             |

|                                     |                                                                                                                       |              |                      |                                     |                                                                                                                                                                                                |
|-------------------------------------|-----------------------------------------------------------------------------------------------------------------------|--------------|----------------------|-------------------------------------|------------------------------------------------------------------------------------------------------------------------------------------------------------------------------------------------|
| Bluethmann S.M. et al.<br>2019 [43] | Prostate cancer survivors were identified between 2004-2014 (data source: Pennsylvania Cancer Registry)               | Pennsylvania | Retrospective cohort | n=90,694; mean age= 66.19 (SD 9.25) | County-level estimates linking to individual-level data by county at time of PC diagnosis; aggregated 2011-2014 prevalence estimates (%) by behavioral risk factor surveillance system (BRFSS) |
| Downer M.K. et al.<br>2019 [13]     | Baseline assessment 1986 until prostate cancer diagnosis or death; last follow-up 2012 (data source: medical records) | US           | Prospective cohort   | n=5,182; age range= 40-75 yrs       | Food Frequency Questionnaires every 4 years                                                                                                                                                    |

**Table S6:** Main characteristics of the studies included in the review that reported on the association between alcohol intake and clinical surrogates of survival of prostate cancer patients.

| First Author, PY             | Period/ Follow-up                                                                                         | Country/<br>Study name | Study design       | Study population           | Outcome             | Alcohol assessment                     |
|------------------------------|-----------------------------------------------------------------------------------------------------------|------------------------|--------------------|----------------------------|---------------------|----------------------------------------|
| Ly D. et al. 2010 [44]       | Baseline assessment 1996, last follow-up 2005 (data source: prostate cancer registry at Cleveland Clinic) | Cleveland              | Prospective cohort | n=2,687; median age 64 yrs | Biochemical Failure | Extracted from patient medical records |
| Burton A.J. et al. 2012 [45] | Baseline assessment 1999; last follow-up 2009 (mean duration of follow-up=4.77, SD 2.33)                  | UK                     | Prospective cohort | n=404, age range=50-69 yrs | PSA growth          | Questionnaire (pre-diagnosis)          |

**Table S7:** Estimated alcohol intake expressed in grams per day (g/day) for estimates and studies included in the meta-analysis.

| First Author, PY                                            | GA        | Comparison                                                 | Estimated comparison                           | RR (95%CI)                                                   | Adj |
|-------------------------------------------------------------|-----------|------------------------------------------------------------|------------------------------------------------|--------------------------------------------------------------|-----|
| <b>Risk of fatal prostate cancer</b>                        |           |                                                            |                                                |                                                              |     |
| Hsing A.W. et al. 1990 [28]                                 | US        | Beer<br>Current <sup>1</sup> vs. never                     | Beer<br>> 0.2g/day <sup>1</sup> vs. 0          | <b>1.2 (0.8-1.7)</b>                                         | Yes |
| Platz A.E. et al. 2003 [29]                                 | US        | Alcohol intake (g/day) <sup>2</sup><br>30.0 -49.9 vs. 0    | 30.0 -49.9 g/day <sup>2</sup><br>vs. 0         | Distant metastatic or fatal cases<br><b>1.09 (0.69-1.71)</b> | Yes |
| Watters L.J. et al. 2010 [30]                               | US        | Alcohol<br>(Drinks/Day) <sup>3</sup><br>≥6 vs. 0           | ≥78g/day vs. 0 <sup>3</sup>                    | Fatal cases<br><b>0.45 (0.25-0.81)</b>                       | Yes |
| Huynh-Le M.P. et al. 2021 [31]                              | Swedish   | History of alcohol intake<br>Yes vs. no                    | History of alcohol<br>Intake<br>Yes vs. 0      | <b>1.44 (1.17-1.78)*</b>                                     | Yes |
| <b>Death from prostate cancer in healthy subjects</b>       |           |                                                            |                                                |                                                              |     |
| Baglietto L. et al. 2006 [33]                               | Australia | 40+ g/day vs. Lifetime abstainers <sup>4</sup>             | +40g/day vs. 0 <sup>4</sup>                    | <b>0.73 (0.32,1.70)</b>                                      | X   |
| Kim M.K. et al 2010 [34]                                    | Korea     | ≥90 g/day vs.<br>Non drinker <sup>5</sup>                  | ≥90 g/day vs. 0 <sup>5</sup>                   | <b>2.39 (0.83-6.89)*</b>                                     | X   |
| Breslow R.A. et al. 2011 [35]                               | US        | Heavier <sup>6</sup> vs.<br>Never drinker <sup>7</sup>     | 26g/day <sup>6</sup> vs. 0 <sup>7</sup>        | <b>0.89 (0.51-1.56)</b>                                      | X   |
| Fowke J.H. et al. 2015 [36]                                 | Asia      | ≥156 g/week vs.<br>1-155 g/week <sup>8</sup>               | ≥22.3 g/day vs.<br>0.1-22.1 g/day <sup>8</sup> | <b>1.00 (0.74-1.35)</b>                                      | X   |
| Dickerman B.A. et al. 2016 [37]                             | Finland   | Heavy vs.<br>light drinkers <sup>9</sup>                   | >26g/day vs.<br>0.01-5.6 g/day <sup>c</sup>    | <b>1.32 (0.66-2.62)</b>                                      | X   |
| <b>Cancer-specific survival of prostate cancer patients</b> |           |                                                            |                                                |                                                              |     |
| Yu G.P. et al. 1997 [38]                                    | US        | Alcohol use:<br>Ever vs. never                             | Ever vs. 0                                     | <b>1.16 (0.70-2.0)</b>                                       |     |
| Farris M.S. et al. 2018 [42]                                | Canada    | Post-diagnosis dose intake<br>≥8.3 drinks/week<br>vs. none | ≥15.4 g/day vs. 0                              | Overall survival:<br><b>0.90 (0.69-1.18)</b>                 | X   |

|                                  |    | Chronic drinking <sup>10</sup><br>Subgroup by age:       | ≥26 g/day <sup>10</sup> vs. 0 | Cause-specific survival: |     |
|----------------------------------|----|----------------------------------------------------------|-------------------------------|--------------------------|-----|
| Bluethmann S.M. et al. 2019 [43] | US | 40-54                                                    | Subgroup by age:<br>40-54     | <b>0.80 (0.63-1.03)</b>  | Yes |
|                                  |    | 55-64                                                    | 55-64                         | <b>1.00 (0.90-1.11)</b>  |     |
|                                  |    | 65-74                                                    | 65-74                         | <b>0.95 (0.88-1.03)</b>  |     |
|                                  |    | 75+                                                      | 75+                           | <b>1.03 (0.95-1.11)</b>  |     |
|                                  |    |                                                          |                               | Overall survival:        |     |
| Downer M.K. et al. 2019 [13]     | US | First post-diagnostic report intake<br>≥30g/day vs. none | ≥30g/day vs. 0                | <b>0.76 (0.52-1.12)</b>  | X   |

1 - Users: at least 6 times a year

2 - We multiplied servings of specified portions of each type of alcoholic beverage by grams of ethanol per serving (beer =12.8 g, red and white wine = 11.0 g, and liquor = 14.0 g) and summed the data for the different types of alcohol to obtain total alcohol intake in grams per day.

3 - One drink was defined as one 12-fluid-ounce beer, one 5-ounce glass of wine, or one 1.5-ounce shot of liquor, all equaling approximately 13 g of alcohol.

4 - Lifetime abstainers <12 alcoholic drinks in a year

5 - Non-drinker, 1.0–14.9, 15.0–29.9, 30.0–89.9, ≥90.0 g/day for men; Non-drinker, 1.0–14.9, ≥15.0 g/day for women.

7 - Never drinker if they had also consumed fewer than 12 drinks over the course of their lifetime.

6 - Heavier drinker: women >7 drinks per week; men >14 drinks per week;

8 Alcohol consumption was calculated in grams per week to unify data on alcohol intake across studies, assuming standard serving sizes (beer = 355 mL, wine = 125 mL, spirits = 35 mL), a standard portion of ethanol per drink (beer = 5%, wine = 12%, spirits = 40%), and 0.789 g of ethanol per mL.

9 Light drinker (average of 0.01–3 drinks/week), moderate drinker (average of 3.01–14 drinks/week), and heavy drinker (average of >14 drinks/week) – defining one drink as 12 grams of alcohol.

10 - Chronic use of alcohol/high risk for heavy drinking (defined as an average ≥2 drinks per day for the last 30 days vs. <2 drinks).

**Tables S8.** Quality in Prognostic Studies (QUIPS) tool

| Study<br>(First author, year)                                                                | QUIPS domains          |                    |                                  |                        |                      |                                       |
|----------------------------------------------------------------------------------------------|------------------------|--------------------|----------------------------------|------------------------|----------------------|---------------------------------------|
|                                                                                              | a) Study participation | b) Study attrition | c) Prognostic factor measurement | d) Outcome measurement | e) Study confounding | f) Statistical analysis and reporting |
| <b>Studies reporting on overall and cancer-specific survival of prostate cancer patients</b> |                        |                    |                                  |                        |                      |                                       |
| <b>Yu, 1997</b>                                                                              | moderate bias          | moderate bias**    | low bias                         | moderate bias          | high bias            | high bias                             |
| <b>Chamie, 2012</b>                                                                          | low bias               | NA                 | moderate bias                    | low bias               | low bias             | low bias                              |
| <b>Jayadevappa, 2016</b>                                                                     | low bias               | NA                 | low bias                         | low bias               | low bias             | low bias                              |
| <b>Brunner, 2016</b>                                                                         | moderate bias          | NA                 | moderate bias                    | moderate bias          | moderate bias        | low bias                              |
| <b>Farris, 2018</b>                                                                          | low bias               | low bias           | low bias                         | low bias               | low bias             | low bias                              |
| <b>Bluethmann, 2019</b>                                                                      | low bias               | NA                 | low bias                         | low bias               | low bias             | low bias                              |
| <b>Downer, 2018</b>                                                                          | low bias               | moderate bias*     | low bias                         | low bias               | low bias             | low bias                              |
| <b>Studies reporting on surrogates of survival survival of prostate cancer patients</b>      |                        |                    |                                  |                        |                      |                                       |
| <b>Ly, 2010</b>                                                                              | low bias               | moderate bias**    | low bias                         | low bias               | high bias            | high bias                             |
| <b>Burton, 2012</b>                                                                          | low bias               | moderate bias**    | low bias                         | low bias               | low bias             | low bias                              |

\*Mean follow-up rates exceed 90% but there is no description of individuals who dropped out of the study

\*\* Despite being prospective studies, if they do not report precise information on this item

**Table S9.** Newcastle-Ottawa quality assessment scale

| Newcastle-Ottawa quality assessment scale                                   | Studies about incidence of fatal prostate cancer |             |               |                |               | Studies about prostate cancer mortality |           |               |             |                 |
|-----------------------------------------------------------------------------|--------------------------------------------------|-------------|---------------|----------------|---------------|-----------------------------------------|-----------|---------------|-------------|-----------------|
|                                                                             | Hsing, 1990                                      | Platz, 2003 | Watters, 2010 | Huynh-Le, 2021 | Dahlman, 2022 | Baglietto, 2006                         | Kim, 2010 | Breslow, 2011 | Fowke, 2015 | Dickerman, 2016 |
| <b>Selection</b>                                                            |                                                  |             |               |                |               |                                         |           |               |             |                 |
| 1) Representativeness of the exposed cohort                                 | 0                                                | 0           | 1             | 1              | 1             | 1                                       | 1         | 1             | 1           | 1               |
| 2) Selection of the non-exposed cohort                                      | 1                                                | 1           | 1             | 1              | 1             | 1                                       | 1         | 1             | 1           | 1               |
| 3) Ascertainment of exposure                                                | 1                                                | 1           | 1             | 0              | 1             | 1                                       | 1         | 1             | 1           | 1               |
| 4) Demonstration that outcome of interest was not present at start of study | 0                                                | 1           | 1             | 0              | 1             | 1                                       | 1         | 0             | 1           | 1               |
| <b>Comparability</b>                                                        |                                                  |             |               |                |               |                                         |           |               |             |                 |
| 1) Comparability of cohorts on the basis of the design or analysis          | 1                                                | 2           | 2             | 1              | 2             | 2                                       | 2         | 2             | 2           | 2               |
| <b>Outcome</b>                                                              |                                                  |             |               |                |               |                                         |           |               |             |                 |
| 1) Assessment of outcome                                                    | 1                                                | 1           | 1             | 0              | 1             | 1                                       | 1         | 1             | 1           | 1               |
| 2) Was follow-up long enough for outcomes to occur                          | 1                                                | 1           | 1             | 1              | 1             | 1                                       | 0         | 1             | 0           | 1               |
| 3) Adequacy of follow-up of cohorts                                         | 1                                                | 1           | 0             | 0              | 0             | 1                                       | 0         | 0             | 0           | 1               |
| <b>Total</b>                                                                | <b>6</b>                                         | <b>8</b>    | <b>8</b>      | <b>4</b>       | <b>6</b>      | <b>9</b>                                | <b>7</b>  | <b>7</b>      | <b>7</b>    | <b>9</b>        |

Table S10. PRISMA 2020 for Abstracts

| Section and Topic       | Item # | Checklist item                                                                                                                                                                                                                                                                                        | Reported (Yes/No) |
|-------------------------|--------|-------------------------------------------------------------------------------------------------------------------------------------------------------------------------------------------------------------------------------------------------------------------------------------------------------|-------------------|
| <b>TITLE</b>            |        |                                                                                                                                                                                                                                                                                                       |                   |
| Title                   | 1      | Identify the report as a systematic review.                                                                                                                                                                                                                                                           | Yes               |
| <b>BACKGROUND</b>       |        |                                                                                                                                                                                                                                                                                                       |                   |
| Objectives              | 2      | Provide an explicit statement of the main objective(s) or question(s) the review addresses.                                                                                                                                                                                                           | Yes               |
| <b>METHODS</b>          |        |                                                                                                                                                                                                                                                                                                       |                   |
| Eligibility criteria    | 3      | Specify the inclusion and exclusion criteria for the review.                                                                                                                                                                                                                                          | No                |
| Information sources     | 4      | Specify the information sources (e.g. databases, registers) used to identify studies and the date when each was last searched.                                                                                                                                                                        | Yes               |
| Risk of bias            | 5      | Specify the methods used to assess risk of bias in the included studies.                                                                                                                                                                                                                              | No                |
| Synthesis of results    | 6      | Specify the methods used to present and synthesise results.                                                                                                                                                                                                                                           | Yes               |
| <b>RESULTS</b>          |        |                                                                                                                                                                                                                                                                                                       |                   |
| Included studies        | 7      | Give the total number of included studies and participants and summarise relevant characteristics of studies.                                                                                                                                                                                         | Yes               |
| Synthesis of results    | 8      | Present results for main outcomes, preferably indicating the number of included studies and participants for each. If meta-analysis was done, report the summary estimate and confidence/credible interval. If comparing groups, indicate the direction of the effect (i.e. which group is favoured). | Yes               |
| <b>DISCUSSION</b>       |        |                                                                                                                                                                                                                                                                                                       |                   |
| Limitations of evidence | 9      | Provide a brief summary of the limitations of the evidence included in the review (e.g. study risk of bias, inconsistency and imprecision).                                                                                                                                                           | Yes               |
| Interpretation          | 10     | Provide a general interpretation of the results and important implications.                                                                                                                                                                                                                           | Yes               |
| <b>OTHER</b>            |        |                                                                                                                                                                                                                                                                                                       |                   |
| Funding                 | 11     | Specify the primary source of funding for the review.                                                                                                                                                                                                                                                 | No                |
| Registration            | 12     | Provide the register name and registration number.                                                                                                                                                                                                                                                    | No                |
